# Supplementary material
Source: Elsevier journal article supplement (https://www.sciencedirect.com/science/article/pii/S0014256518301188)
Supplement: mmc1 [file S0014256518301188:mmc1.docx]

**DIABETES TIPO 2 INFANTOJUVENIL**

**PREGUNTAS TIPO TEST**

1. Se considera obesidad en los niños de 2 a 19 años:

1. IMC entre el percentil 75 y 85
2. IMC entre el percentil 85 y 95
3. IMC ≥ percentil 95
4. IMC > del percentil 99
5. IMC > 120% del percentil 95

**Respuesta correcta:**

**c. El sobrepeso y la obesidad en los niños de 2 a 19 años se clasifican según el percentil del índice de masa corporal (IMC) (peso en kg/m2) por edad y sexo, considerándose obesidad un IMC mayor o igual al percentil 95.**

2. Entre los factores que predisponen a la obesidad infantil se encuentran todos los siguientes menos uno:

1. Pocas horas de actividad física a la semana.
2. Dormir más de 8 horas diarias.
3. Dedicar más de dos horas al día a ver la televisión.
4. Entorno familiar con ingresos económicos bajos y bajo nivel de estudio.
5. Todas son verdaderas.

**Respuesta correcta:**

**b. Se ha descrito que el IMC aumenta de forma significativa e inversa a la frecuencia con la que se realiza actividad física, así como en los escolares que dedican más de 2 horas al día a ver la televisión y en los que duermen menos de 8 horas diarias. En cambio, en las familias con mayor ingreso económico y mayor nivel de estudio la prevalencia de sobrepeso y obesidad es más baja.**

3. Todas las siguientes son características de la DM2 en la adolescencia excepto una:

1. Suele presentarse a partir de los 10 años.
2. El inicio puede ser insidioso o asintomático.
3. Puede haber historia familiar de DM2.
4. El péptido C suele estar disminuido.
5. La cetosis suele estar ausente.

**Respuesta correcta:**

**d. La DM2 suele presentarse a partir de los diez años y el inicio puede ser insidioso o asintomático. Los síntomas son variables y suele haber historia familiar de DM2. Habitualmente la cetosis suele estar ausente y los niveles de péptido C pueden estar normales o aumentados.**

4. El cribado para la DM2 en niños asintomáticos:

1. No resulta coste efectivo realizar un cribado de DM2 a toda la población joven.
2. Se recomienda a los 10 años o al inicio de la pubertad si ésta ocurre antes.
3. Debe hacerse cada 3 años.
4. Puede utilizarse la GPA o la SOG.
5. Todas las respuestas anteriores son verdaderas.

**Respuesta correcta:**

**e. Actualmente, no resulta coste efectivo realizar un cribado de DM2 para toda la población joven por lo que solo sería aconsejable estudiar a los sujetos de mayor riesgo. Esta relación tan directa con la obesidad apoya que la ADA recomiende el cribado en niños y adolescentes de alto riesgo con sobrepeso a los 10 años o al inicio de la pubertad si esta ocurre antes y con una frecuencia de cada tres años. La prueba de elección sería la glucosa plasmática en ayunas (GPA) o la sobrecarga oral de glucosa (SOG).**
